# Supplementary material for: Deciphering the enigma of RNA editing in the ATP1_alpha subunit of ATP synthase in Triticum aestivum
Source: PubMed Central journal article supplement — Saudi J Biol Sci. 2023 Jun 9;30(7):103703. doi: 10.1016/j.sjbs.2023.103703 (PMC10300253; doi:10.1016/j.sjbs.2023.103703), 2023-06-09
Supplement: mmc3.pdf [file mmc3.pdf]

|                   |                   |                   |                   |                   |                   |     |  |  |    |     |
|-------------------|-------------------|-------------------|-------------------|-------------------|-------------------|-----|--|--|----|-----|
|                   |                   |                   |                   | 20                |                   |     |  |  | 40 |     |
| atp1_G168_DNA     | <b>ATGGAATTCT</b> | <b>CACCCAGAGC</b> | <b>TGCGGAACTC</b> | <b>ACGACTCTAT</b> | <b>TAGAAAGTAG</b> |     |  |  |    | 50  |
| Translation +1    | M E F             | S P R A           | A E L             | T T L             | L E S R           |     |  |  |    |     |
| atp1 G168 control | .....             | .....             | .....             | .....             | .....             |     |  |  |    | 50  |
| Translation +1    | M E F             | S P R A           | A E L             | T T L             | L E S R           |     |  |  |    |     |
| atp1 G168 2H      | .....             | .....             | .....             | .....             | .....             |     |  |  |    | 50  |
| Translation +1    | M E F             | S P R A           | A E L             | T T L             | L E S R           |     |  |  |    |     |
| atp1 G168 12H     | .....             | .....             | .....             | .....             | .....             |     |  |  |    | 50  |
| Translation +1    | M E F             | S P R A           | A E L             | T T L             | L E S R           |     |  |  |    |     |
|                   |                   | 60                |                   | 80                |                   | 100 |  |  |    |     |
| atp1_G168_DNA     | <b>AATGACCAAC</b> | <b>TTTTACACGA</b> | <b>ATTTTCAAGT</b> | <b>GGATGAGATC</b> | <b>GGTCGAGTGG</b> |     |  |  |    | 100 |
| Translation +1    | M T N             | F Y T             | N F Q V           | D E I             | G R V             |     |  |  |    |     |
| atp1 G168 control | .....             | .....             | .....             | .....             | .....             |     |  |  |    | 100 |
| Translation +1    | M T N             | F Y T             | N F Q V           | D E I             | G R V             |     |  |  |    |     |
| atp1 G168 2H      | .....             | .....             | .....             | .....             | .....             |     |  |  |    | 100 |
| Translation +1    | M T N             | F Y T             | N F Q V           | D E I             | G R V             |     |  |  |    |     |
| atp1 G168 12H     | .....             | .....             | .....             | .....             | .....             |     |  |  |    | 100 |
| Translation +1    | M T N             | F Y T             | N F Q V           | D E I             | G R V             |     |  |  |    |     |
|                   |                   | 120               |                   | 140               |                   |     |  |  |    |     |
| atp1_G168_DNA     | <b>TCTCAGTTGG</b> | <b>AGATGGGATT</b> | <b>GCACGTGTTT</b> | <b>ATGGATTGAA</b> | <b>CGAGATTCAA</b> |     |  |  |    | 150 |
| Translation +1    | V S V G           | D G I             | A R V             | Y G L N           | E I Q             |     |  |  |    |     |
| atp1 G168 control | .....             | .....             | .....             | .....             | .....             |     |  |  |    | 150 |
| Translation +1    | V S V G           | D G I             | A R V             | Y G L N           | E I Q             |     |  |  |    |     |
| atp1 G168 2H      | .....             | .....             | .....             | .....             | .....             |     |  |  |    | 150 |
| Translation +1    | V S V G           | D G I             | A R V             | Y G L N           | E I Q             |     |  |  |    |     |
| atp1 G168 12H     | .....             | .....             | .....             | .....             | .....             |     |  |  |    | 150 |
| Translation +1    | V S V G           | D G I             | A R V             | Y G L N           | E I Q             |     |  |  |    |     |
|                   |                   | 160               |                   | 180               |                   | 200 |  |  |    |     |
| atp1_G168_DNA     | <b>GCAGGAGAAA</b> | <b>TGGTGGAAAT</b> | <b>TGCCAGCGGT</b> | <b>GTGAAAGGAA</b> | <b>TCGCCTTAAA</b> |     |  |  |    | 200 |
| Translation +1    | A G E             | M V E F           | A S G             | V K G             | I A L N           |     |  |  |    |     |
| atp1 G168 control | .....             | .....             | .....             | .....             | .....             |     |  |  |    | 200 |
| Translation +1    | A G E             | M V E F           | A S G             | V K G             | I A L N           |     |  |  |    |     |
| atp1 G168 2H      | .....             | .....             | .....             | .....             | .....             |     |  |  |    | 200 |
| Translation +1    | A G E             | M V E F           | A S G             | V K G             | I A L N           |     |  |  |    |     |
| atp1 G168 12H     | .....             | .....             | .....             | .....             | .....             |     |  |  |    | 200 |
| Translation +1    | A G E             | M V E F           | A S G             | V K G             | I A L N           |     |  |  |    |     |
|                   |                   | 220               |                   | 240               |                   |     |  |  |    |     |
| atp1_G168_DNA     | <b>TCTTGAGAAT</b> | <b>GAGAATGTAG</b> | <b>GTATTGTTGT</b> | <b>CTTTGGTAGT</b> | <b>GATACCGCTA</b> |     |  |  |    | 250 |
| Translation +1    | L E N             | E N V             | G I V V           | F G S             | D T A             |     |  |  |    |     |
| atp1 G168 control | .....             | .....             | .....             | .....             | .....             |     |  |  |    | 250 |
| Translation +1    | L E N             | E N V             | G I V V           | F G S             | D T A             |     |  |  |    |     |
| atp1 G168 2H      | .....             | .....             | .....             | .....             | .....             |     |  |  |    | 250 |
| Translation +1    | L E N             | E N V             | G I V V           | F G S             | D T A             |     |  |  |    |     |
| atp1 G168 12H     | .....             | .....             | .....             | .....             | .....             |     |  |  |    | 250 |
| Translation +1    | L E N             | E N V             | G I V V           | F G S             | D T A             |     |  |  |    |     |
|                   |                   | 260               |                   | 280               |                   | 300 |  |  |    |     |
| atp1_G168_DNA     | <b>TTAAAGAAGG</b> | <b>AGATCTTGTC</b> | <b>AAGCGCACTG</b> | <b>GATCTATTGT</b> | <b>GGATGTTTCT</b> |     |  |  |    | 300 |
| Translation +1    | I K E G           | D L V             | K R T             | G S I V           | D V P             |     |  |  |    |     |
| atp1 G168 control | .....             | .....             | .....             | .....             | .....             |     |  |  |    | 300 |
| Translation +1    | I K E G           | D L V             | K R T             | G S I V           | D V P             |     |  |  |    |     |
| atp1 G168 2H      | .....             | .....             | .....             | .....             | .....             |     |  |  |    | 300 |
| Translation +1    | I K E G           | D L V             | K R T             | G S I V           | D V P             |     |  |  |    |     |
| atp1 G168 12H     | .....             | .....             | .....             | .....             | .....             |     |  |  |    | 300 |
| Translation +1    | I K E G           | D L V             | K R T             | G S I V           | D V P             |     |  |  |    |     |
|                   |                   | 320               |                   | 340               |                   |     |  |  |    |     |
| atp1_G168_DNA     | <b>GCGGGAAGG</b>  | <b>CCATGTTAGG</b> | <b>CCGTGTGGTC</b> | <b>GACGCCTTGG</b> | <b>GAGTACCTAT</b> |     |  |  |    | 350 |
| Translation +1    | A G K             | A M L G           | R V V             | D A L             | G V P I           |     |  |  |    |     |
| atp1 G168 control | .....             | .....             | .....             | .....             | .....             |     |  |  |    | 350 |
| Translation +1    | A G K             | A M L G           | R V V             | D A L             | G V P I           |     |  |  |    |     |
| atp1 G168 2H      | .....             | .....             | .....             | .....             | .....             |     |  |  |    | 350 |
| Translation +1    | A G K             | A M L G           | R V V             | D A L             | G V P I           |     |  |  |    |     |
| atp1 G168 12H     | .....             | .....             | .....             | .....             | .....             |     |  |  |    | 350 |
| Translation +1    | A G K             | A M L G           | R V V             | D A L             | G V P I           |     |  |  |    |     |

|                   |                   |                   |                   |                   |                   |     |     |
|-------------------|-------------------|-------------------|-------------------|-------------------|-------------------|-----|-----|
|                   |                   | 360               |                   | 380               |                   | 400 |     |
| atp1_G168_DNA     | <b>TGATGGAAA</b>  | <b>GGGGCTCTAA</b> | <b>GCGATCACGA</b> | <b>ACGAAGACGT</b> | <b>GTCGAAGTGA</b> |     | 400 |
| Translation +1    | D G K             | G A L             | S D H E           | R R R             | V E V             |     |     |
| atp1 G168 control | .....             | .....             | .....             | .....             | .....             |     | 400 |
| Translation +1    | D G K             | G A L             | S D H E           | R R R             | V E V             |     |     |
| atp1 G168 2H      | .....             | .....             | .....             | .....             | .....             |     | 400 |
| Translation +1    | D G K             | G A L             | S D H E           | R R R             | V E V             |     |     |
| atp1 G168 12H     | .....             | .....             | .....             | .....             | .....             |     | 400 |
| Translation +1    | D G K             | G A L             | S D H E           | R R R             | V E V             |     |     |
|                   |                   |                   |                   |                   |                   |     |     |
|                   |                   | 420               |                   | 440               |                   |     |     |
| atp1_G168_DNA     | <b>AAGCCCCAGG</b> | <b>GATTATTGAA</b> | <b>CGTAAATCTG</b> | <b>TGCACGAACC</b> | <b>CATGCAAACA</b> |     | 450 |
| Translation +1    | K A P G           | I I E             | R K S             | V H E P           | M Q T             |     |     |
| atp1 G168 control | .....             | .....             | .....             | .....             | .....             |     | 450 |
| Translation +1    | K A P G           | I I E             | R K S             | V H E P           | M Q T             |     |     |
| atp1 G168 2H      | .....             | .....             | .....             | .....             | .....             |     | 450 |
| Translation +1    | K A P G           | I I E             | R K S             | V H E P           | M Q T             |     |     |
| atp1 G168 12H     | .....             | .....             | .....             | .....             | .....             |     | 450 |
| Translation +1    | K A P G           | I I E             | R K S             | V H E P           | M Q T             |     |     |
|                   |                   |                   |                   |                   |                   |     |     |
|                   |                   | 460               |                   | 480               |                   | 500 |     |
| atp1_G168_DNA     | <b>GGCTTAAAAG</b> | <b>CAGTGGATAG</b> | <b>CCTGGTTCCT</b> | <b>ATAGGCCGTG</b> | <b>GTCAACGAGA</b> |     | 500 |
| Translation +1    | G L K             | A V D S           | L V P             | I G R             | G Q R E           |     |     |
| atp1 G168 control | .....             | .....             | .....             | .....             | .....             |     | 500 |
| Translation +1    | G L K             | A V D S           | L V P             | I G R             | G Q R E           |     |     |
| atp1 G168 2H      | .....             | .....             | .....             | .....             | .....             |     | 500 |
| Translation +1    | G L K             | A V D S           | L V P             | I G R             | G Q R E           |     |     |
| atp1 G168 12H     | .....             | .....             | .....             | .....             | .....             |     | 500 |
| Translation +1    | G L K             | A V D S           | L V P             | I G R             | G Q R E           |     |     |
|                   |                   |                   |                   |                   |                   |     |     |
|                   |                   | 520               |                   | 540               |                   |     |     |
| atp1_G168_DNA     | <b>ACTTATAATC</b> | <b>GGGGACAGAC</b> | <b>AAACTGGAAA</b> | <b>AACTGCAATA</b> | <b>GCTATCGATA</b> |     | 550 |
| Translation +1    | L I I             | G D R             | Q T G K           | T A I             | A I D             |     |     |
| atp1 G168 control | .....             | .....             | .....             | .....             | .....             |     | 550 |
| Translation +1    | L I I             | G D R             | Q T G K           | T A I             | A I D             |     |     |
| atp1 G168 2H      | .....             | .....             | .....             | .....             | .....             |     | 550 |
| Translation +1    | L I I             | G D R             | Q T G K           | T A I             | A I D             |     |     |
| atp1 G168 12H     | .....             | .....             | .....             | .....             | .....             |     | 550 |
| Translation +1    | L I I             | G D R             | Q T G K           | T A I             | A I D             |     |     |
|                   |                   |                   |                   |                   |                   |     |     |
|                   |                   | 560               |                   | 580               |                   | 600 |     |
| atp1_G168_DNA     | <b>CTATATTA</b>   | <b>CAAAAAGCAA</b> | <b>ATGAACTCAA</b> | <b>GGGGCACAAA</b> | <b>TGAGAGTGAG</b> |     | 600 |
| Translation +1    | T I L N           | Q K Q             | M N S             | R G T N           | E S E             |     |     |
| atp1 G168 control | .....             | .....             | .....             | .....             | .....             |     | 600 |
| Translation +1    | T I L N           | Q K Q             | M N S             | R G T N           | E S E             |     |     |
| atp1 G168 2H      | .....             | .....             | .....             | .....             | .....             |     | 600 |
| Translation +1    | T I L N           | Q K Q             | M N S             | R G T N           | E S E             |     |     |
| atp1 G168 12H     | .....             | .....             | .....             | .....             | .....             |     | 600 |
| Translation +1    | T I L N           | Q K Q             | M N S             | R G T N           | E S E             |     |     |
|                   |                   |                   |                   |                   |                   |     |     |
|                   |                   | 620               |                   | 640               |                   |     |     |
| atp1_G168_DNA     | <b>ACATTGTATT</b> | <b>GTGTCTATGT</b> | <b>TGCGATTGGA</b> | <b>CAAAAACGCT</b> | <b>CGACTGTGGC</b> |     | 650 |
| Translation +1    | T L Y             | C V Y V           | A I G             | Q K R             | S T V A           |     |     |
| atp1 G168 control | .....             | .....             | .....             | .....             | .....             |     | 650 |
| Translation +1    | T L Y             | C V Y V           | A I G             | Q K R             | S T V A           |     |     |
| atp1 G168 2H      | .....             | .....             | .....             | .....             | .....             |     | 650 |
| Translation +1    | T L Y             | C V Y V           | A I G             | Q K R             | S T V A           |     |     |
| atp1 G168 12H     | .....             | .....             | .....             | .....             | .....             |     | 650 |
| Translation +1    | T L Y             | C V Y V           | A I G             | Q K R             | S T V A           |     |     |
|                   |                   |                   |                   |                   |                   |     |     |
|                   |                   | 660               |                   | 680               |                   | 700 |     |
| atp1_G168_DNA     | <b>ACAATTAGTT</b> | <b>CAAATCTTTT</b> | <b>CAGAAGCGAA</b> | <b>TGCTTTGGAA</b> | <b>TATTCCATTC</b> |     | 700 |
| Translation +1    | Q L V             | Q I L             | S E A N           | A L E             | Y S I             |     |     |
| atp1 G168 control | .....             | .....             | .....             | .....             | .....             |     | 700 |
| Translation +1    | Q L V             | Q I L             | S E A N           | A L E             | Y S I             |     |     |
| atp1 G168 2H      | .....             | .....             | .....             | .....             | .....             |     | 700 |
| Translation +1    | Q L V             | Q I L             | S E A N           | A L E             | Y S I             |     |     |
| atp1 G168 12H     | .....             | .....             | .....             | .....             | .....             |     | 700 |
| Translation +1    | Q L V             | Q I L             | S E A N           | A L E             | Y S I             |     |     |

```

          720                               740
atp1_G168_DNA TTGTAGCAGC CACCGCTTCG GATCCTGCTC CTCTGCAATT TCTGGCCCCA 750
Translation +1 L V A A T A S D P A P L Q F L A P
atp1 G168 control ..... 750
Translation +1 L V A A T A S D P A P L Q F L A P
atp1 G168 2H ..... 750
Translation +1 L V A A T A S D P A P L Q F L A P
atp1 G168 12H ..... 750
Translation +1 L V A A T A S D P A P L Q F L A P

          760                               780                               800
atp1_G168_DNA TATTCAGGGT GTGCCATGGG GGAATATTTT CGTGATAATG GAATGCATGC 800
Translation +1 Y S G C A M G E Y F R D N G M H A
atp1 G168 control .....C.....C..... 800
Translation +1 Y S G C A M G E Y F R D N G M H A
atp1 G168 2H .....C.....C..... 800
Translation +1 Y S G C A M G E Y F R D N G M H A
atp1 G168 12H .....C.....C..... 800
Translation +1 Y S G C A M G E Y F R D N G M H A

          820                               840
atp1_G168_DNA ATTAATTATA TATGATGATC TAAGTAAACA GGCGGTGGCA TATCGACAAA 850
Translation +1 L I I Y D D L S K Q A V A Y R Q
atp1 G168 control ..... 850
Translation +1 L I I Y D D L S K Q A V A Y R Q
atp1 G168 2H ..... 850
Translation +1 L I I Y D D L S K Q A V A Y R Q
atp1 G168 12H ..... 850
Translation +1 L I I Y D D L S K Q A V A Y R Q

          860                               880                               900
atp1_G168_DNA TGTCATTATT GTTACGCCGA CCACCAGGCC GTGAGGCTTT CCCAGGGGAT 900
Translation +1 M S L L L R R P P G R E A F P G D
atp1 G168 control ..... 900
Translation +1 M S L L L R R P P G R E A F P G D
atp1 G168 2H ..... 900
Translation +1 M S L L L R R P P G R E A F P G D
atp1 G168 12H ..... 900
Translation +1 M S L L L R R P P G R E A F P G D

          920                               940
atp1_G168_DNA GTTTTCTATT TACATTCCCG TCTCTTAGAA AGAGCCGCTA AACGATCGGA 950
Translation +1 V F Y L H S R L L E R A A K R S D
atp1 G168 control ..... 950
Translation +1 V F Y L H S R L L E R A A K R S D
atp1 G168 2H ..... 950
Translation +1 V F Y L H S R L L E R A A K R S D
atp1 G168 12H ..... 950
Translation +1 V F Y L H S R L L E R A A K R S D

          960                               980                               1,000
atp1_G168_DNA CCAGACAGGT GCAGGTAGCT CGACTGCGTT ACCCGTGATT GAGACTCAAT 1000
Translation +1 Q T G A G S S T A L P V I E T Q
atp1 G168 control .....T..... 1000
Translation +1 Q T G A G S L T A L P V I E T Q
atp1 G168 2H .....T..... 1000
Translation +1 Q T G A G S L T A L P V I E T Q
atp1 G168 12H .....T..... 1000
Translation +1 Q T G A G S L T A L P V I E T Q

          1,020                               1,040
atp1_G168_DNA CTGGAGACGT TTCCGCCTAT ATCCCCACCA ATGTAATCTC CATTACAGAT 1050
Translation +1 S G D V S A Y I P T N V I S I T D
atp1 G168 control .....T..T..T..... 1050
Translation +1 S G D V S A Y I P T N V I S I T D
atp1 G168 2H .....T..T..T..... 1050
Translation +1 S G D V S A Y I P T N V I S I T D
atp1 G168 12H .....T..T..T..... 1050
Translation +1 S G D V S A Y I P T N V I S I T D

```

|                   |                    |                   |                   |                   |                    |                   |      |
|-------------------|--------------------|-------------------|-------------------|-------------------|--------------------|-------------------|------|
|                   |                    | 1,060             |                   | 1,080             |                    | 1,100             |      |
| atp1_G168_DNA     | <b>GGACAAATCT</b>  | <b>GTTTGAAAC</b>  | <b>AGAGCTCTTT</b> | <b>TATCGCGGAA</b> | <b>TTAGACCAGC</b>  |                   | 1100 |
| Translation +1    | G Q I C L E T      | E L F Y R G       | I R P A           |                   |                    |                   |      |
| atp1 G168 control | .....              | .....             | .....             | .....             | .....              |                   | 1100 |
| Translation +1    | G Q I C L E T      | E L F Y R G       | I R P A           |                   |                    |                   |      |
| atp1 G168 2H      | .....              | .....             | .....             | .....             | .....              |                   | 1100 |
| Translation +1    | G Q I C L E T      | E L F Y R G       | I R P A           |                   |                    |                   |      |
| atp1 G168 12H     | .....              | .....             | .....             | .....             | .....              |                   | 1100 |
| Translation +1    | G Q I C L E T      | E L F Y R G       | I R P A           |                   |                    |                   |      |
|                   |                    | 1,120             |                   | 1,140             |                    |                   |      |
| atp1_G168_DNA     | <b>TATTAACGTT</b>  | <b>GGCTTATCCG</b> | <b>TCAGTGC</b>    | <b>CGT</b>        | <b>GGGTCTGCC</b>   | <b>GCTCAGTTGA</b> | 1150 |
| Translation +1    | I N V G L S        | V S R V           | G S A             | A Q L             |                    |                   |      |
| atp1 G168 control | .....              | .....             | .....             | .....             | .....              |                   | 1150 |
| Translation +1    | I N V G L S        | V S R V           | G S A             | A Q L             |                    |                   |      |
| atp1 G168 2H      | .....              | .....             | .....             | .....             | .....              |                   | 1150 |
| Translation +1    | I N V G L S        | V S R V           | G S A             | A Q L             |                    |                   |      |
| atp1 G168 12H     | .....              | .....             | .....             | .....             | .....              |                   | 1150 |
| Translation +1    | I N V G L S        | V S R V           | G S A             | A Q L             |                    |                   |      |
|                   |                    | 1,160             |                   | 1,180             |                    | 1,200             |      |
| atp1_G168_DNA     | <b>AAGCTATGAA</b>  | <b>ACAAGTCTGC</b> | <b>GGTAGTTCAA</b> | <b>AACTGGAATT</b> | <b>GGCACAAATAT</b> |                   | 1200 |
| Translation +1    | K A M K            | Q V C G S S       | K L E L           | A Q Y             |                    |                   |      |
| atp1 G168 control | .....              | .....             | .....             | .....             | .....              |                   | 1200 |
| Translation +1    | K A M K            | Q V C G S L       | K L E L           | A Q Y             |                    |                   |      |
| atp1 G168 2H      | .....              | .....             | .....             | .....             | .....              |                   | 1200 |
| Translation +1    | K A M K            | Q V C G S L       | K L E L           | A Q Y             |                    |                   |      |
| atp1 G168 12H     | .....              | .....             | .....             | .....             | .....              |                   | 1200 |
| Translation +1    | K A M K            | Q V C G S L       | K L E L           | A Q Y             |                    |                   |      |
|                   |                    | 1,220             |                   | 1,240             |                    |                   |      |
| atp1_G168_DNA     | <b>CGCGAAGTGG</b>  | <b>CCGCCTTCGC</b> | <b>TCAATTTGGG</b> | <b>TCAGACCTTG</b> | <b>ATGCTGCGAC</b>  |                   | 1250 |
| Translation +1    | R E V A A F A      | Q F G S D L       | D A A T           |                   |                    |                   |      |
| atp1 G168 control | .....              | .....             | .....             | .....             | .....              |                   | 1250 |
| Translation +1    | R E V A A F A      | Q F G S D L       | D A A T           |                   |                    |                   |      |
| atp1 G168 2H      | .....              | .....             | .....             | .....             | .....              |                   | 1250 |
| Translation +1    | R E V A A F A      | Q F G S D L       | D A A T           |                   |                    |                   |      |
| atp1 G168 12H     | .....              | .....             | .....             | .....             | .....              |                   | 1250 |
| Translation +1    | R E V A A F A      | Q F G S D L       | D A A T           |                   |                    |                   |      |
|                   |                    | 1,260             |                   | 1,280             |                    | 1,300             |      |
| atp1_G168_DNA     | <b>TCAGGCATTA</b>  | <b>CTCAATAGAG</b> | <b>GTGCAAGGCT</b> | <b>TACAGAAGTG</b> | <b>CCCAAACAAC</b>  |                   | 1300 |
| Translation +1    | Q A L L N R        | G A R L           | T E V P K Q       |                   |                    |                   |      |
| atp1 G168 control | .....              | .....             | .....             | .....             | .....              |                   | 1300 |
| Translation +1    | Q A L L N R        | G A R L           | T E V L K Q       |                   |                    |                   |      |
| atp1 G168 2H      | .....              | .....             | .....             | .....             | .....              |                   | 1300 |
| Translation +1    | Q A L L N R        | G A R L           | T E V L K Q       |                   |                    |                   |      |
| atp1 G168 12H     | .....              | .....             | .....             | .....             | .....              |                   | 1300 |
| Translation +1    | Q A L L N R        | G A R L           | T E V L K Q       |                   |                    |                   |      |
|                   |                    | 1,320             |                   | 1,340             |                    |                   |      |
| atp1_G168_DNA     | <b>CACAAATATGA</b> | <b>ACCACTTCCA</b> | <b>ATTGAAAAAC</b> | <b>AAATTGTTGT</b> | <b>GATTTATGCT</b>  |                   | 1350 |
| Translation +1    | P Q Y E P L P      | I E K Q I V V     | I Y A             |                   |                    |                   |      |
| atp1 G168 control | .....              | .....             | .....             | .....             | .....              |                   | 1350 |
| Translation +1    | P Q Y E P L P      | I E K Q I V V     | I Y A             |                   |                    |                   |      |
| atp1 G168 2H      | .....              | .....             | .....             | .....             | .....              |                   | 1350 |
| Translation +1    | P Q Y E P L P      | I E K Q I V V     | I Y A             |                   |                    |                   |      |
| atp1 G168 12H     | .....              | .....             | .....             | .....             | .....              |                   | 1350 |
| Translation +1    | P Q Y E P L P      | I E K Q I V V     | I Y A             |                   |                    |                   |      |
|                   |                    | 1,360             |                   | 1,380             |                    | 1,400             |      |
| atp1_G168_DNA     | <b>GCTGTCAACG</b>  | <b>GCTTCTGTGA</b> | <b>TCGAATGCCA</b> | <b>CTAGACAGAA</b> | <b>TTTCTCAATA</b>  |                   | 1400 |
| Translation +1    | A V N G F C D      | R M P L D R       | I S Q Y           |                   |                    |                   |      |
| atp1 G168 control | .....              | .....             | .....             | .....             | .....              |                   | 1400 |
| Translation +1    | A V N G F C D      | R M P L D R       | I S Q Y           |                   |                    |                   |      |
| atp1 G168 2H      | .....              | .....             | .....             | .....             | .....              |                   | 1400 |
| Translation +1    | A V N G F C D      | R M P L D R       | I S Q Y           |                   |                    |                   |      |
| atp1 G168 12H     | .....              | .....             | .....             | .....             | .....              |                   | 1400 |
| Translation +1    | A V N G F C D      | R M P L D R       | I S Q Y           |                   |                    |                   |      |

|                   |            |            |            |       |            |            |  |       |  |      |
|-------------------|------------|------------|------------|-------|------------|------------|--|-------|--|------|
|                   |            |            |            | 1,420 |            |            |  | 1,440 |  |      |
| atp1_G168_DNA     | TGAAAAAGCC | ATTCTAAGTA | CTATTAATCC |       | AGAATTACAA | AAATCCTTCT |  |       |  | 1450 |
| Translation +1    | E K A      | I L S      | T I N P    |       | E L Q      | K S F      |  |       |  |      |
| atp1 G168 control | .....      | .....      | .....      |       | .....      | .....      |  |       |  | 1450 |
| Translation +1    | E K A      | I L S      | T I N P    |       | E L Q      | K S F      |  |       |  |      |
| atp1 G168 2H      | .....      | .....      | .....      |       | .....      | .....      |  |       |  | 1450 |
| Translation +1    | E K A      | I L S      | T I N P    |       | E L Q      | K S F      |  |       |  |      |
| atp1 G168 12H     | .....      | .....      | .....      |       | .....      | .....      |  |       |  | 1450 |
| Translation +1    | E K A      | I L S      | T I N P    |       | E L Q      | K S F      |  |       |  |      |

|                   |            |            |            |            |            |       |      |
|-------------------|------------|------------|------------|------------|------------|-------|------|
|                   |            | 1,460      |            | 1,480      |            | 1,500 |      |
| atp1_G168_DNA     | TAGAAAAAGG | TGGCTTAACT | AACGAAAGAA | AGATGGAACC | AGATGCTTCT |       | 1500 |
| Translation +1    | L E K G    | G L T      | N E R      | K M E P    | D A S      |       |      |
| atp1 G168 control | .....      | .....      | .....      | .....      | .....      |       | 1500 |
| Translation +1    | L E K G    | G L T      | N E R      | K M E L    | D A F      |       |      |
| atp1 G168 2H      | .....      | .....      | .....      | .....      | .....      |       | 1500 |
| Translation +1    | L E K G    | G L T      | N E R      | K M E L    | D A F      |       |      |
| atp1 G168 12H     | .....      | .....      | .....      | .....      | .....      |       | 1500 |
| Translation +1    | L E K G    | G L T      | N E R      | K M E L    | D A F      |       |      |

|                   |            |            |            |      |
|-------------------|------------|------------|------------|------|
|                   |            |            | 1,520      |      |
| atp1_G168_DNA     | TTAAAAGAAA | GCACCTTGCC | TTACCTGTGA | 1530 |
| Translation +1    | L K E      | S T L P    | Y L *      |      |
| atp1 G168 control | .....      | .....      | .....      | 1530 |
| Translation +1    | L K E      | S T L P    | Y L *      |      |
| atp1 G168 2H      | .....      | .....      | .....      | 1530 |
| Translation +1    | L K E      | S T L P    | Y L *      |      |
| atp1 G168 12H     | .....      | .....      | .....      | 1530 |
| Translation +1    | L K E      | S T L P    | Y L *      |      |
