# Supplementary material for: Deciphering the enigma of RNA editing in the ATP1_alpha subunit of ATP synthase in Triticum aestivum
Source: PubMed Central journal article supplement — Saudi J Biol Sci. 2023 Jun 9;30(7):103703. doi: 10.1016/j.sjbs.2023.103703 (PMC10300253; doi:10.1016/j.sjbs.2023.103703), 2023-06-09
Supplement: mmc4.pdf [file mmc4.pdf]

|                   |            |            |            |            |            |     |     |
|-------------------|------------|------------|------------|------------|------------|-----|-----|
|                   |            | 360        |            | 380        |            | 400 |     |
| atp1_GM10_DNA-2   | TGATGGAAA  | GGGGCTCTAA | GCGATCACGA | ACGAAGACGT | GTCGAAGTGA |     | 400 |
| Translation +1    | D G K      | G A L      | S D H E    | R R R      | V E V      |     |     |
| atp1 GM CONTROL-2 | .....      | .....      | .....      | .....      | .....      |     | 400 |
| Translation +1    | D G K      | G A L      | S D H E    | R R R      | V E V      |     |     |
| atp1 GM 2h        | .....      | .....      | .....      | .....      | .....      |     | 400 |
| Translation +1    | D G K      | G A L      | S D H E    | R R R      | V E V      |     |     |
| atp1 GM12H        | .....      | .....      | .....      | .....      | .....      |     | 400 |
| Translation +1    | D G K      | G A L      | S D H E    | R R R      | V E V      |     |     |
|                   |            | 420        |            | 440        |            |     |     |
| atp1_GM10_DNA-2   | AAGCCCCAGG | GATTATTGAA | CGTAAATCTG | TGCACGAACC | CATGCAAACA |     | 450 |
| Translation +1    | K A P G    | I I E      | R K S      | V H E P    | M Q T      |     |     |
| atp1 GM CONTROL-2 | .....      | .....      | .....      | .....      | .....      |     | 450 |
| Translation +1    | K A P G    | I I E      | R K S      | V H E P    | M Q T      |     |     |
| atp1 GM 2h        | .....      | .....      | .....      | .....      | .....      |     | 450 |
| Translation +1    | K A P G    | I I E      | R K S      | V H E P    | M Q T      |     |     |
| atp1 GM12H        | .....      | .....      | .....      | .....      | .....      |     | 450 |
| Translation +1    | K A P G    | I I E      | R K S      | V H E P    | M Q T      |     |     |
|                   |            | 460        |            | 480        |            | 500 |     |
| atp1_GM10_DNA-2   | GGCTTAAAAG | CAGTGGATAG | CCTGGTTCCT | ATAGGCCGTG | GTCAACGAGA |     | 500 |
| Translation +1    | G L K      | A V D S    | L V P      | I G R      | G Q R E    |     |     |
| atp1 GM CONTROL-2 | .....      | .....      | .....      | .....      | .....      |     | 500 |
| Translation +1    | G L K      | A V D S    | L V P      | I G R      | G Q R E    |     |     |
| atp1 GM 2h        | .....      | .....      | .....      | .....      | .....      |     | 500 |
| Translation +1    | G L K      | A V D S    | L V P      | I G R      | G Q R E    |     |     |
| atp1 GM12H        | .....      | .....      | .....      | .....      | .....      |     | 500 |
| Translation +1    | G L K      | A V D S    | L V P      | I G R      | G Q R E    |     |     |
|                   |            | 520        |            | 540        |            |     |     |
| atp1_GM10_DNA-2   | ACTTATAATC | GGGGACAGAC | AAACTGGAAA | AACTGCAATA | GCTATCGATA |     | 550 |
| Translation +1    | L I I      | G D R      | Q T G K    | T A I      | A I D      |     |     |
| atp1 GM CONTROL-2 | .....      | .....      | .....      | .....      | .....      |     | 550 |
| Translation +1    | L I I      | G D R      | Q T G K    | T A I      | A I D      |     |     |
| atp1 GM 2h        | .....      | .....      | .....      | .....      | .....      |     | 550 |
| Translation +1    | L I I      | G D R      | Q T G K    | T A I      | A I D      |     |     |
| atp1 GM12H        | .....      | .....      | .....      | .....      | .....      |     | 550 |
| Translation +1    | L I I      | G D R      | Q T G K    | T A I      | A I D      |     |     |
|                   |            | 560        |            | 580        |            | 600 |     |
| atp1_GM10_DNA-2   | CTATATTTAA | CCAAAAGCAA | ATGAACTCAA | GGGGCACAAA | TGAGAGTGAG |     | 600 |
| Translation +1    | T I L N    | Q K Q      | M N S      | R G T N    | E S E      |     |     |
| atp1 GM CONTROL-2 | .....      | .....      | .....      | .....      | .....      |     | 600 |
| Translation +1    | T I L N    | Q K Q      | M N S      | R G T N    | E S E      |     |     |
| atp1 GM 2h        | .....      | .....      | .....      | .....      | .....      |     | 600 |
| Translation +1    | T I L N    | Q K Q      | M N S      | R G T N    | E S E      |     |     |
| atp1 GM12H        | .....      | .....      | .....      | .....      | .....      |     | 600 |
| Translation +1    | T I L N    | Q K Q      | M N S      | R G T N    | E S E      |     |     |
|                   |            | 620        |            | 640        |            |     |     |
| atp1_GM10_DNA-2   | ACATTGTATT | GTGTCTATGT | TGCGATTGGA | CAAAAACGCT | CGACTGTGGC |     | 650 |
| Translation +1    | T L Y      | C V Y V    | A I G      | Q K R      | S T V A    |     |     |
| atp1 GM CONTROL-2 | .....      | .....      | .....      | .....      | .....      |     | 650 |
| Translation +1    | T L Y      | C V Y V    | A I G      | Q K R      | S T V A    |     |     |
| atp1 GM 2h        | .....      | .....      | .....      | .....      | .....      |     | 650 |
| Translation +1    | T L Y      | C V Y V    | A I G      | Q K R      | S T V A    |     |     |
| atp1 GM12H        | .....      | .....      | .....      | .....      | .....      |     | 650 |
| Translation +1    | T L Y      | C V Y V    | A I G      | Q K R      | S T V A    |     |     |
|                   |            | 660        |            | 680        |            | 700 |     |
| atp1_GM10_DNA-2   | ACAATTAGTT | CAAATCTTT  | CAGAAGCGAA | TGCTTTGGAA | TATTCCATTC |     | 700 |
| Translation +1    | Q L V      | Q I L      | S E A N    | A L E      | Y S I      |     |     |
| atp1 GM CONTROL-2 | .....      | .....      | .....      | .....      | .....      |     | 700 |
| Translation +1    | Q L V      | Q I L      | S E A N    | A L E      | Y S I      |     |     |
| atp1 GM 2h        | .....      | .....      | .....      | .....      | .....      |     | 700 |
| Translation +1    | Q L V      | Q I L      | S E A N    | A L E      | Y S I      |     |     |
| atp1 GM12H        | .....      | .....      | .....      | .....      | .....      |     | 700 |
| Translation +1    | Q L V      | Q I L      | S E A N    | A L E      | Y S I      |     |     |

|                   |                   |                   |                   |     |                   |                   |  |     |       |      |
|-------------------|-------------------|-------------------|-------------------|-----|-------------------|-------------------|--|-----|-------|------|
|                   |                   |                   |                   | 720 |                   |                   |  | 740 |       |      |
| atp1_GM10_DNA-2   | <b>TTGTAGCAGC</b> | <b>CACCGCTTCG</b> | <b>GATCCTGCTC</b> |     | <b>CTCTGCAATT</b> | <b>TCTGGCCCCA</b> |  |     |       | 750  |
| Translation +1    | L V A A           | T A S             | D P A             |     | P L Q F           | L A P             |  |     |       |      |
| atp1 GM CONTROL-2 | .....             | .....             | .....             |     | .....             | .....             |  |     |       | 750  |
| Translation +1    | L V A A           | T A S             | D P A             |     | P L Q F           | L A P             |  |     |       |      |
| atp1 GM 2h        | .....             | .....             | .....             |     | .....             | .....             |  |     |       | 750  |
| Translation +1    | L V A A           | T A S             | D P A             |     | P L Q F           | L A P             |  |     |       |      |
| atp1 GM12H        | .....             | .....             | .....             |     | .....             | .....             |  |     |       | 750  |
| Translation +1    | L V A A           | T A S             | D P A             |     | P L Q F           | L A P             |  |     |       |      |
|                   |                   | 760               |                   |     | 780               |                   |  |     | 800   |      |
| atp1_GM10_DNA-2   | <b>TATTCAGGGT</b> | <b>GTGCCATGGG</b> | <b>GGAATATTTT</b> |     | <b>CGCGATAATG</b> | <b>GAATGCACGC</b> |  |     |       | 800  |
| Translation +1    | Y S G             | C A M G           | E Y F             |     | R D N             | G M H A           |  |     |       |      |
| atp1 GM CONTROL-2 | .....             | .....             | .....             |     | .....             | .....             |  |     |       | 800  |
| Translation +1    | Y S G             | C A M G           | E Y F             |     | R D N             | G M H A           |  |     |       |      |
| atp1 GM 2h        | .....             | .....             | .....             |     | .....             | .....             |  |     |       | 800  |
| Translation +1    | Y S G             | C A M G           | E Y F             |     | R D N             | G M H A           |  |     |       |      |
| atp1 GM12H        | .....             | .....             | .....             |     | .....             | .....             |  |     |       | 800  |
| Translation +1    | Y S G             | C A M G           | E Y F             |     | R D N             | G M H A           |  |     |       |      |
|                   |                   |                   | 820               |     |                   | 840               |  |     |       |      |
| atp1_GM10_DNA-2   | <b>ATTAATTATA</b> | <b>TATGATGATC</b> | <b>TAAGTAAACA</b> |     | <b>GGCGGTGGCA</b> | <b>TATCGACAAA</b> |  |     |       | 850  |
| Translation +1    | L I I             | Y D D             | L S K Q           |     | A V A             | Y R Q             |  |     |       |      |
| atp1 GM CONTROL-2 | .....             | .....             | .....             |     | .....             | .....             |  |     |       | 850  |
| Translation +1    | L I I             | Y D D             | L S K Q           |     | A V A             | Y R Q             |  |     |       |      |
| atp1 GM 2h        | .....             | .....             | .....             |     | .....             | .....             |  |     |       | 850  |
| Translation +1    | L I I             | Y D D             | L S K Q           |     | A V A             | Y R Q             |  |     |       |      |
| atp1 GM12H        | .....             | .....             | .....             |     | .....             | .....             |  |     |       | 850  |
| Translation +1    | L I I             | Y D D             | L S K Q           |     | A V A             | Y R Q             |  |     |       |      |
|                   |                   | 860               |                   |     | 880               |                   |  |     | 900   |      |
| atp1_GM10_DNA-2   | <b>TGTCATTATT</b> | <b>GTTACGCCGA</b> | <b>CCACCAGGCC</b> |     | <b>GTGAGGCTTT</b> | <b>CCCAGGGGAT</b> |  |     |       | 900  |
| Translation +1    | M S L L           | L R R             | P P G             |     | R E A F           | P G D             |  |     |       |      |
| atp1 GM CONTROL-2 | .....             | .....             | .....             |     | .....             | .....             |  |     |       | 900  |
| Translation +1    | M S L L           | L R R             | P P G             |     | R E A F           | P G D             |  |     |       |      |
| atp1 GM 2h        | .....             | .....             | .....             |     | .....             | .....             |  |     |       | 900  |
| Translation +1    | M S L L           | L R R             | P P G             |     | R E A F           | P G D             |  |     |       |      |
| atp1 GM12H        | .....             | .....             | .....             |     | .....             | .....             |  |     |       | 900  |
| Translation +1    | M S L L           | L R R             | P P G             |     | R E A F           | P G D             |  |     |       |      |
|                   |                   |                   | 920               |     |                   | 940               |  |     |       |      |
| atp1_GM10_DNA-2   | <b>GTTTTCTATT</b> | <b>TACATTCCCG</b> | <b>TCTCTTAGAA</b> |     | <b>AGAGCCGCTA</b> | <b>AACGATCGGA</b> |  |     |       | 950  |
| Translation +1    | V F Y             | L H S R           | L L E             |     | R A A             | K R S D           |  |     |       |      |
| atp1 GM CONTROL-2 | .....             | .....             | .....             |     | .....             | .....             |  |     |       | 950  |
| Translation +1    | V F Y             | L H S R           | L L E             |     | R A A             | K R S D           |  |     |       |      |
| atp1 GM 2h        | .....             | .....             | .....             |     | .....             | .....             |  |     |       | 950  |
| Translation +1    | V F Y             | L H S R           | L L E             |     | R A A             | K R S D           |  |     |       |      |
| atp1 GM12H        | .....             | .....             | .....             |     | .....             | .....             |  |     |       | 950  |
| Translation +1    | V F Y             | L H S R           | L L E             |     | R A A             | K R S D           |  |     |       |      |
|                   |                   | 960               |                   |     | 980               |                   |  |     | 1,000 |      |
| atp1_GM10_DNA-2   | <b>CCAGACAGGT</b> | <b>GCAGGTAGCT</b> | <b>CGACTGCGTT</b> |     | <b>ACCCGTGATT</b> | <b>GAGACTCAAT</b> |  |     |       | 1000 |
| Translation +1    | Q T G             | A G S             | S T A L           |     | P V I             | E T Q             |  |     |       |      |
| atp1 GM CONTROL-2 | .....             | .....             | .....             |     | .....             | .....             |  |     |       | 1000 |
| Translation +1    | Q T G             | A G S             | L T A L           |     | P V I             | E T Q             |  |     |       |      |
| atp1 GM 2h        | .....             | .....             | .....             |     | .....             | .....             |  |     |       | 1000 |
| Translation +1    | Q T G             | A G S             | L T A L           |     | P V I             | E T Q             |  |     |       |      |
| atp1 GM12H        | .....             | .....             | .....             |     | .....             | .....             |  |     |       | 1000 |
| Translation +1    | Q T G             | A G S             | L T A L           |     | P V I             | E T Q             |  |     |       |      |
|                   |                   |                   | 1,020             |     |                   | 1,040             |  |     |       |      |
| atp1_GM10_DNA-2   | <b>CTGGAGACGT</b> | <b>TTCCGCCTAT</b> | <b>ATTCCTACTA</b> |     | <b>ATGTAATCTC</b> | <b>CATTACAGAT</b> |  |     |       | 1050 |
| Translation +1    | S G D V           | S A Y             | I P T             |     | N V I S           | I T D             |  |     |       |      |
| atp1 GM CONTROL-2 | .....             | .....             | .....             |     | .....             | .....             |  |     |       | 1050 |
| Translation +1    | S G D V           | S A Y             | I P T             |     | N V I S           | I T D             |  |     |       |      |
| atp1 GM 2h        | .....             | .....             | .....             |     | .....             | .....             |  |     |       | 1050 |
| Translation +1    | S G D V           | S A Y             | I P T             |     | N V I S           | I T D             |  |     |       |      |
| atp1 GM12H        | .....             | .....             | .....             |     | .....             | .....             |  |     |       | 1050 |
| Translation +1    | S G D V           | S A Y             | I P T             |     | N V I S           | I T D             |  |     |       |      |

|                   |               |               |               |            |            |       |      |
|-------------------|---------------|---------------|---------------|------------|------------|-------|------|
|                   |               | 1,060         |               | 1,080      |            | 1,100 |      |
| atp1_GM10_DNA-2   | GGACAAATCT    | GTTTGGAAAC    | AGAGCTCTTT    | TATCGGGAA  | TTAGACCAGC |       | 1100 |
| Translation +1    | G Q I C L E T | E L F Y R G   | I R P A       |            |            |       |      |
| atp1 GM CONTROL-2 | .....         | .....         | .....         | .....      | .....      |       | 1100 |
| Translation +1    | G Q I C L E T | E L F Y R G   | I R P A       |            |            |       |      |
| atp1 GM 2h        | .....         | .....         | .....         | .....      | .....      |       | 1100 |
| Translation +1    | G Q I C L E T | E L F Y R G   | I R P A       |            |            |       |      |
| atp1 GM12H        | .....         | .....         | .....         | .....      | .....      |       | 1100 |
| Translation +1    | G Q I C L E T | E L F Y R G   | I R P A       |            |            |       |      |
|                   |               | 1,120         |               | 1,140      |            |       |      |
| atp1_GM10_DNA-2   | TATTAACGTT    | GGCTTATCCG    | TCAGTCGCGT    | CGGGTCTGCC | GCTCAGTTGA |       | 1150 |
| Translation +1    | I N V G L S   | V S R V       | G S A A Q L   |            |            |       |      |
| atp1 GM CONTROL-2 | .....         | .....         | .....         | .....      | .....      |       | 1150 |
| Translation +1    | I N V G L S   | V S R V       | G S A A Q L   |            |            |       |      |
| atp1 GM 2h        | .....         | .....         | .....         | .....      | .....      |       | 1150 |
| Translation +1    | I N V G L S   | V S R V       | G S A A Q L   |            |            |       |      |
| atp1 GM12H        | .....         | .....         | .....         | .....      | .....      |       | 1150 |
| Translation +1    | I N V G L S   | V S R V       | G S A A Q L   |            |            |       |      |
|                   |               | 1,160         |               | 1,180      |            | 1,200 |      |
| atp1_GM10_DNA-2   | AAGCTATGAA    | ACAAGTCTGC    | GGTAGTTCAA    | AACTGGAATT | GGCACAATAT |       | 1200 |
| Translation +1    | K A M K       | Q V C G S S   | K L E L A Q Y |            |            |       |      |
| atp1 GM CONTROL-2 | .....         | .....         | .....         | .....      | .....      |       | 1200 |
| Translation +1    | K A M K       | Q V C G S L   | K L E L A Q Y |            |            |       |      |
| atp1 GM 2h        | .....         | .....         | .....         | .....      | .....      |       | 1200 |
| Translation +1    | K A M K       | Q V C G S L   | K L E L A Q Y |            |            |       |      |
| atp1 GM12H        | .....         | .....         | .....         | .....      | .....      |       | 1200 |
| Translation +1    | K A M K       | Q V C G S L   | K L E L A Q Y |            |            |       |      |
|                   |               | 1,220         |               | 1,240      |            |       |      |
| atp1_GM10_DNA-2   | CGCGAAGTGG    | CCGCCTTCGC    | TCAATTTGGG    | TCAGACCTTG | ATGCTGCGAC |       | 1250 |
| Translation +1    | R E V A A F A | Q F G S D L   | D A A T       |            |            |       |      |
| atp1 GM CONTROL-2 | .....         | .....         | .....         | .....      | .....      |       | 1250 |
| Translation +1    | R E V A A F A | Q F G S D L   | D A A T       |            |            |       |      |
| atp1 GM 2h        | .....         | .....         | .....         | .....      | .....      |       | 1250 |
| Translation +1    | R E V A A F A | Q F G S D L   | D A A T       |            |            |       |      |
| atp1 GM12H        | .....         | .....         | .....         | .....      | .....      |       | 1250 |
| Translation +1    | R E V A A F A | Q F G S D L   | D A A T       |            |            |       |      |
|                   |               | 1,260         |               | 1,280      |            | 1,300 |      |
| atp1_GM10_DNA-2   | TCAGGCATTA    | CTCAATAGAG    | GTGCAAGGCT    | TACAGAAGTG | CCCAAACAAC |       | 1300 |
| Translation +1    | Q A L L N R   | G A R L T E V | P K Q         |            |            |       |      |
| atp1 GM CONTROL-2 | .....         | .....         | .....         | .....      | .....      |       | 1300 |
| Translation +1    | Q A L L N R   | G A R L T E V | L K Q         |            |            |       |      |
| atp1 GM 2h        | .....         | .....         | .....         | .....      | .....      |       | 1300 |
| Translation +1    | Q A L L N R   | G A R L T E V | L K Q         |            |            |       |      |
| atp1 GM12H        | .....         | .....         | .....         | .....      | .....      |       | 1300 |
| Translation +1    | Q A L L N R   | G A R L T E V | L K Q         |            |            |       |      |
|                   |               | 1,320         |               | 1,340      |            |       |      |
| atp1_GM10_DNA-2   | CACAAATGA     | ACCACTTCCA    | ATTGAAAAAC    | AAATTGTTGT | GATTTATGCT |       | 1350 |
| Translation +1    | P Q Y E P L P | I E K Q I V V | I Y A         |            |            |       |      |
| atp1 GM CONTROL-2 | .....         | .....         | .....         | .....      | .....      |       | 1350 |
| Translation +1    | P Q Y E P L P | I E K Q I V V | I Y A         |            |            |       |      |
| atp1 GM 2h        | .....         | .....         | .....         | .....      | .....      |       | 1350 |
| Translation +1    | P Q Y E P L P | I E K Q I V V | I Y A         |            |            |       |      |
| atp1 GM12H        | .....         | .....         | .....         | .....      | .....      |       | 1350 |
| Translation +1    | P Q Y E P L P | I E K Q I V V | I Y A         |            |            |       |      |
|                   |               | 1,360         |               | 1,380      |            | 1,400 |      |
| atp1_GM10_DNA-2   | GCTGTCAACG    | GCTTCTGTGA    | TCGAATGCCA    | CTAGACAGAA | TTTCTCAATA |       | 1400 |
| Translation +1    | A V N G F C D | R M P L D R   | I S Q Y       |            |            |       |      |
| atp1 GM CONTROL-2 | .....         | .....         | .....         | .....      | .....      |       | 1400 |
| Translation +1    | A V N G F C D | R M P L D R   | I S Q Y       |            |            |       |      |
| atp1 GM 2h        | .....         | .....         | .....         | .....      | .....      |       | 1400 |
| Translation +1    | A V N G F C D | R M P L D R   | I S Q Y       |            |            |       |      |
| atp1 GM12H        | .....         | .....         | .....         | .....      | .....      |       | 1400 |
| Translation +1    | A V N G F C D | R M P L D R   | I S Q Y       |            |            |       |      |

|                   |                   |                   |                   |       |                   |                   |  |       |       |      |
|-------------------|-------------------|-------------------|-------------------|-------|-------------------|-------------------|--|-------|-------|------|
|                   |                   |                   |                   | 1,420 |                   |                   |  | 1,440 |       |      |
| atp1_GM10_DNA-2   | <b>TGAAAAAGCC</b> | <b>ATTCTAAGTA</b> | <b>CTATTAATCC</b> |       | <b>AGAATTACAA</b> | <b>AAATCCTTCT</b> |  |       |       | 1450 |
| Translation +1    | E K A             | I L S             | T I N P           |       | E L Q             | K S F             |  |       |       |      |
| atp1 GM CONTROL-2 | .....             | .....             | .....             |       | .....             | .....             |  |       |       | 1450 |
| Translation +1    | E K A             | I L S             | T I N P           |       | E L Q             | K S F             |  |       |       |      |
| atp1 GM 2h        | .....             | .....             | .....             |       | .....             | .....             |  |       |       | 1450 |
| Translation +1    | E K A             | I L S             | T I N P           |       | E L Q             | K S F             |  |       |       |      |
| atp1 GM12H        | .....             | .....             | .....             |       | .....             | .....             |  |       |       | 1450 |
| Translation +1    | E K A             | I L S             | T I N P           |       | E L Q             | K S F             |  |       |       |      |
|                   |                   |                   |                   |       |                   |                   |  |       |       |      |
|                   |                   | 1,460             |                   |       | 1,480             |                   |  |       | 1,500 |      |
| atp1_GM10_DNA-2   | <b>TAGAAAAAGG</b> | <b>TGGCTTAACT</b> | <b>AACGAAAGAA</b> |       | <b>AGATGGAACC</b> | <b>AGATGCTTCT</b> |  |       |       | 1500 |
| Translation +1    | L E K G           | G L T             | N E R             |       | K M E P           | D A S             |  |       |       |      |
| atp1 GM CONTROL-2 | .....             | .....             | .....             |       | .....             | .....             |  |       |       | 1500 |
| Translation +1    | L E K G           | G L T             | N E R             |       | K M E L           | D A F             |  |       |       |      |
| atp1 GM 2h        | .....             | .....             | .....             |       | .....             | .....             |  |       |       | 1500 |
| Translation +1    | L E K G           | G L T             | N E R             |       | K M E L           | D A F             |  |       |       |      |
| atp1 GM12H        | .....             | .....             | .....             |       | .....             | .....             |  |       |       | 1500 |
| Translation +1    | L E K G           | G L T             | N E R             |       | K M E L           | D A F             |  |       |       |      |
|                   |                   |                   |                   |       |                   |                   |  |       |       |      |
|                   |                   |                   |                   | 1,520 |                   |                   |  |       |       |      |
| atp1_GM10_DNA-2   | <b>TTAAAAGAAA</b> | <b>GCACTTTGCC</b> | <b>TTACCTGTGA</b> |       |                   |                   |  |       |       | 1530 |
| Translation +1    | L K E             | S T L P           | Y L *             |       |                   |                   |  |       |       |      |
| atp1 GM CONTROL-2 | .....             | .....             | .....             |       |                   |                   |  |       |       | 1530 |
| Translation +1    | L K E             | S T L P           | Y L *             |       |                   |                   |  |       |       |      |
| atp1 GM 2h        | .....             | .....             | .....             |       |                   |                   |  |       |       | 1530 |
| Translation +1    | L K E             | S T L P           | Y L *             |       |                   |                   |  |       |       |      |
| atp1 GM12H        | .....             | .....             | .....             |       |                   |                   |  |       |       | 1530 |
| Translation +1    | L K E             | S T L P           | Y L *             |       |                   |                   |  |       |       |      |
