# Supplementary figures and images for: Deciphering the enigma of RNA editing in the ATP1_alpha subunit of ATP synthase in Triticum aestivum
Source: PubMed Central journal article supplement — Saudi J Biol Sci. 2023 Jun 9;30(7):103703. doi: 10.1016/j.sjbs.2023.103703 (PMC10300253; doi:10.1016/j.sjbs.2023.103703), 2023-06-09

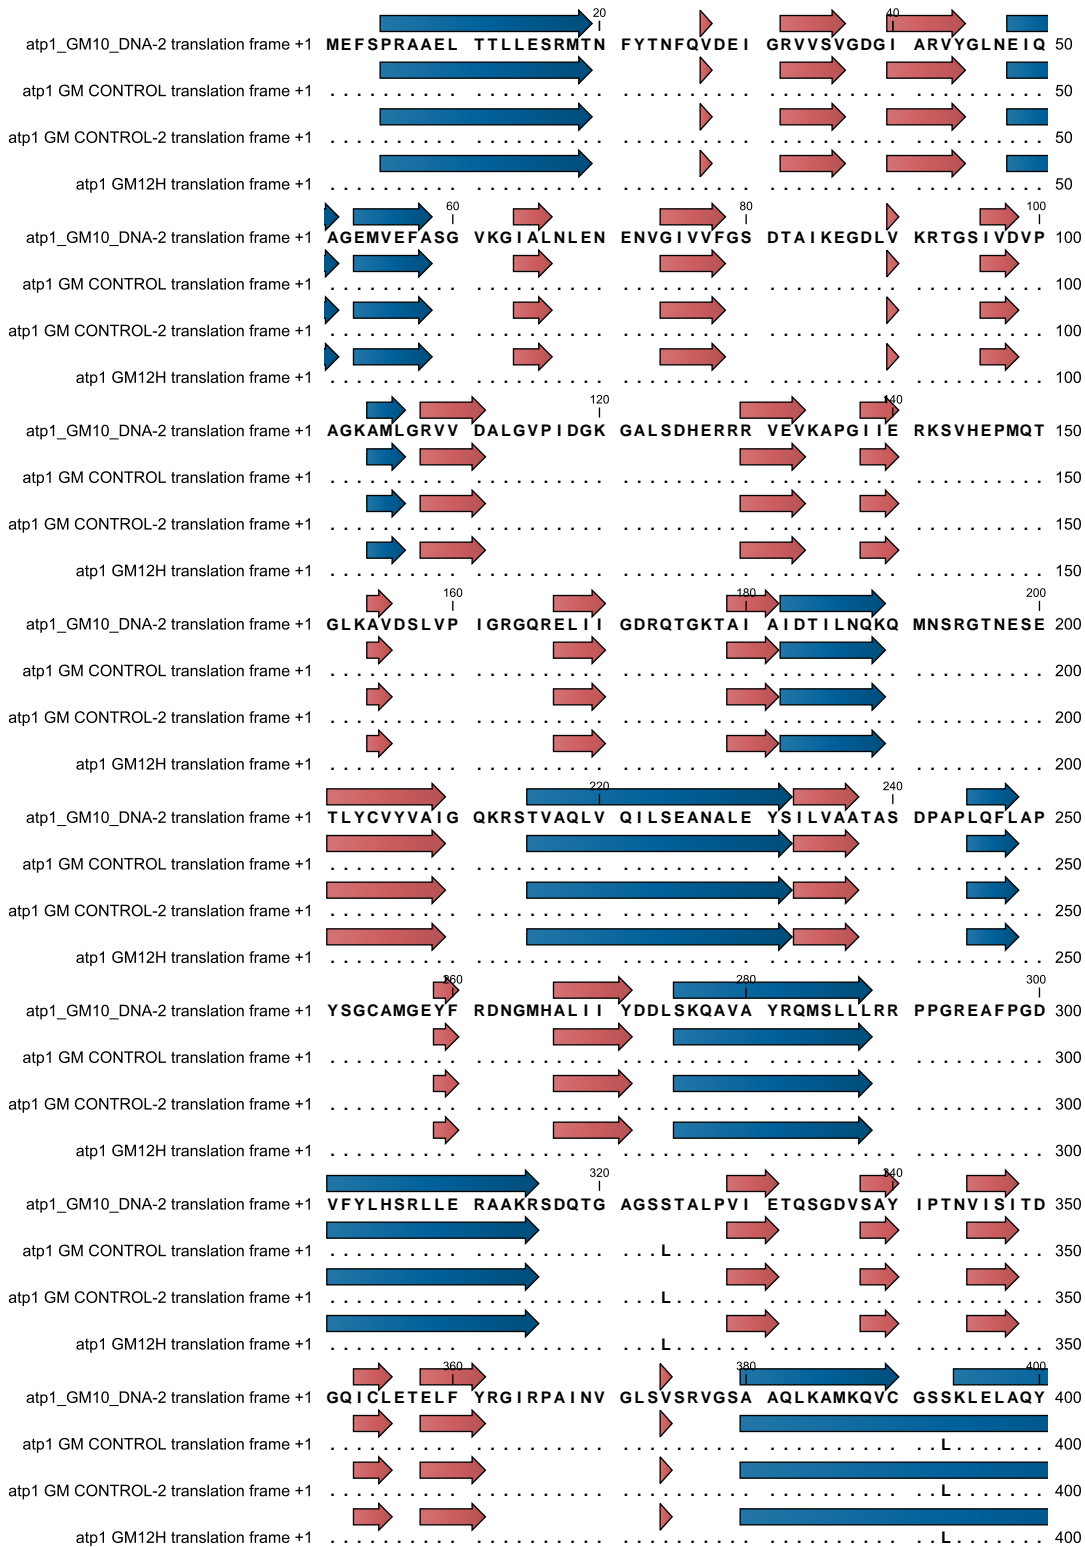

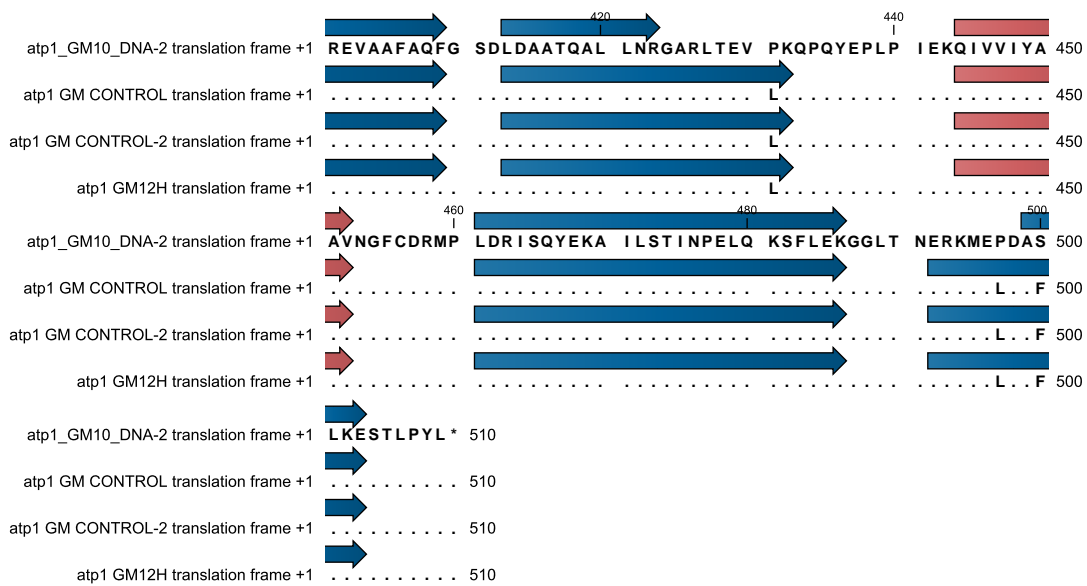

Supplement: mmc6.pdf [file mmc6.pdf]
